# Supplementary material
Source: publisher figshare collection journal article supplement (https://tandf.figshare.com/ndownloader/files/22045080)
Supplement: Supplementary file 1 [file 22045080]

## **Online Supplemental Material**

### **Dry deposition of ammonia around paddy fields in the subtropical hilly area in southern China**

Yuchen YI<sup>a,b,c</sup>, Jianlin SHEN<sup>b,c</sup>, Chaodong YANG<sup>a</sup>, Juan WANG<sup>b,c</sup>, Yong LI<sup>b,c</sup>, and Jinshui WU<sup>b,c</sup>

<sup>a</sup>College of Horticulture and Gardening, Yangtze University, Jingzhou, China; <sup>b</sup>Key Laboratory of Agro-ecological Processes in Subtropical Regions, Institute of Subtropical Agriculture, Chinese Academy of Sciences, Changsha, China; <sup>c</sup>Changsha Research Station for Agricultural & Environment Monitoring, Institute of Subtropical Agriculture, Chinese Academy of Sciences, Changsha, China

**This file includes:  
Supplementary Figures S1–S3**

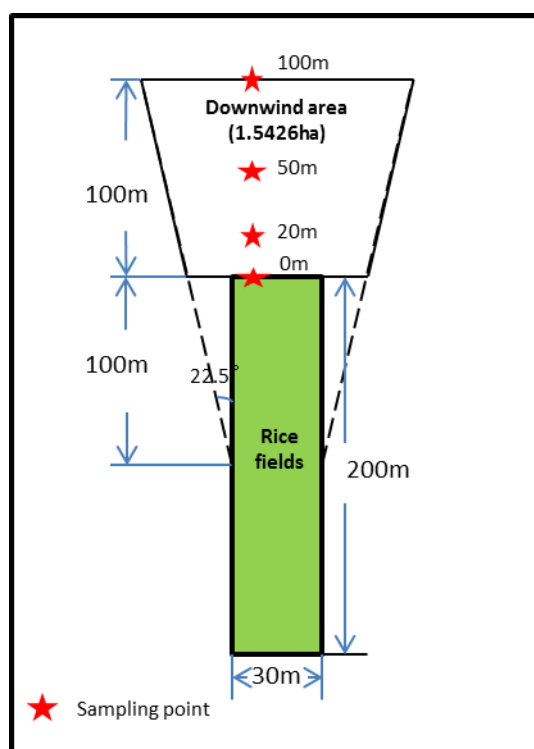

**Figure S1.** Ammonia dry deposition monitoring sites in the downwind area within 100 m from the paddy fields.

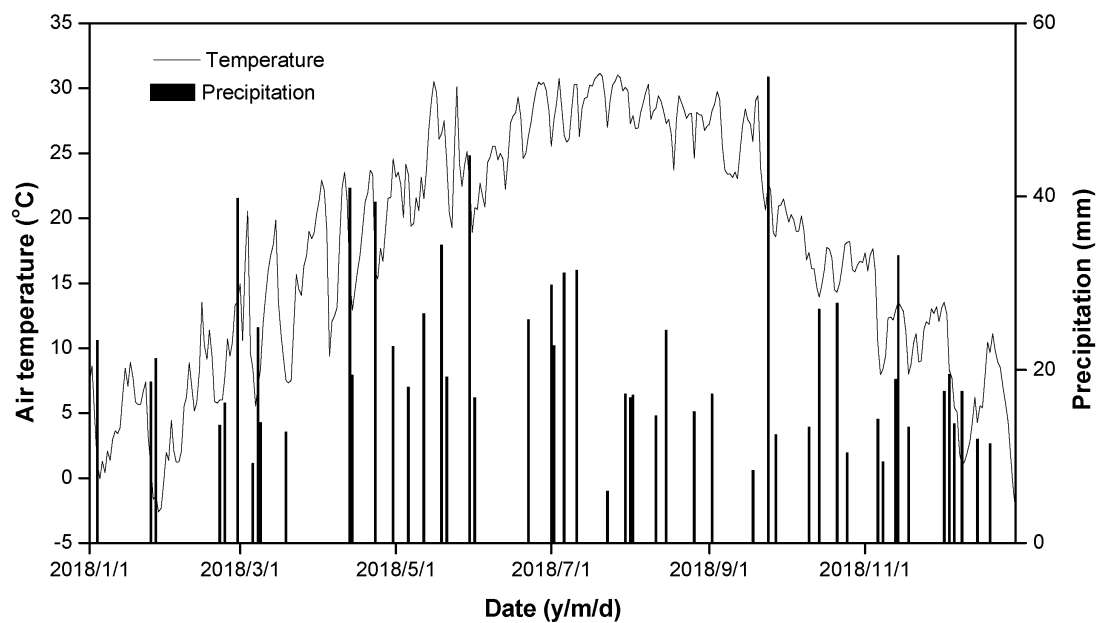

**Figure S2.** Daily mean air temperature and rainfall during the sampling period of 2018.

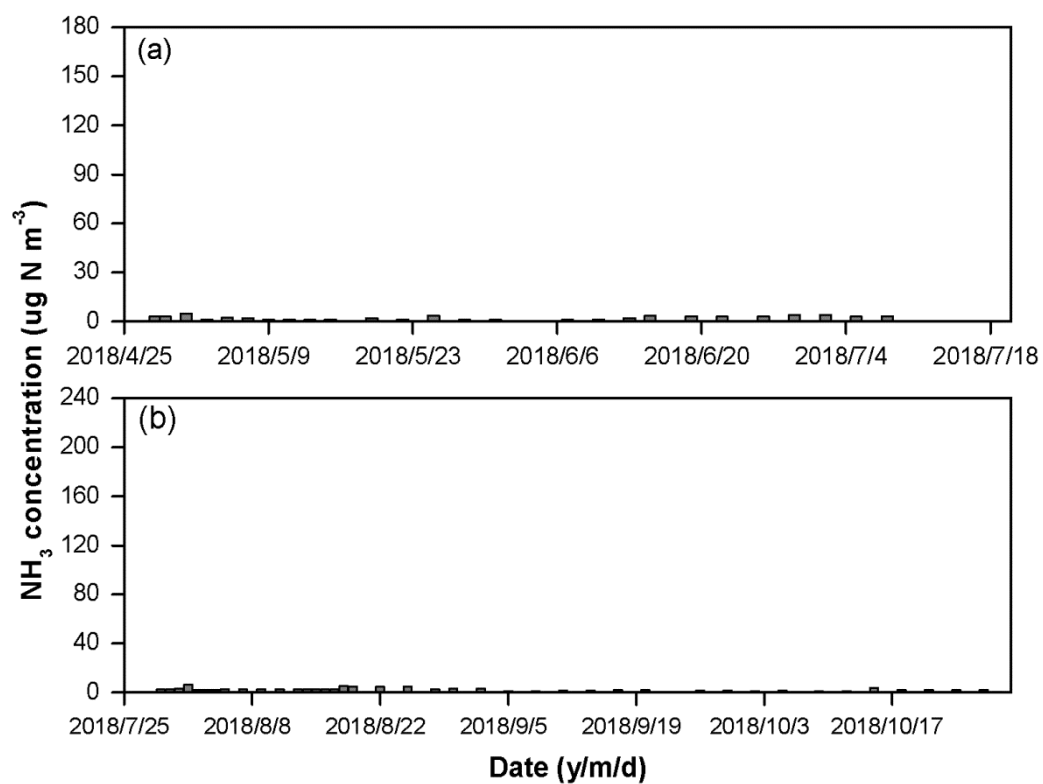

**Figure S3.** Daily  $\text{NH}_3$  concentrations at the background site in the (a) early rice season and (b) late rice season.
